# Supplementary figures and images for: High prevalence of cardiac dysfunction or overt heart failure in 71-year-old men: A 21-year follow-up of “The Study of men born in 1943”
Source: Oxford University Press journal article supplement (doi:10.1177/2047487319871644), 2019-08-25

Appendix Figure 1. Flow diagram for the two cohorts in the study.

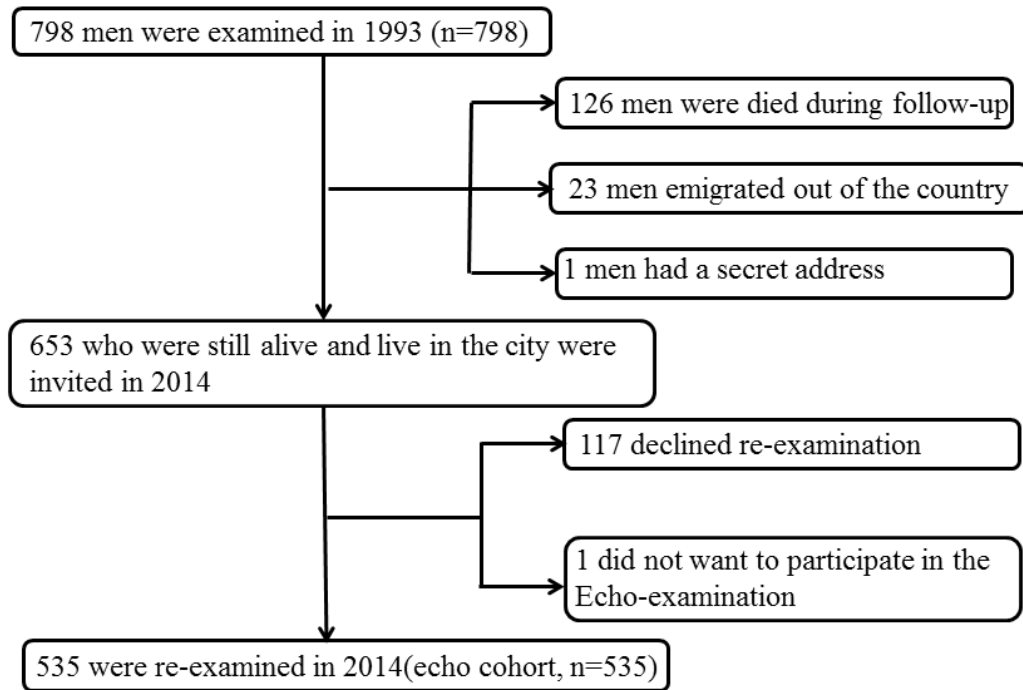

Supplement: supplemental_material2.pdf [file supplemental_material2.pdf]
